# Supplementary material
Source: Elsevier journal article supplement (https://www.sciencedirect.com/science/article/pii/S1699258X16301292)
Supplement: mmc1 [file S1699258X16301292:mmc1.pdf]

GRADO DE ACUERDO DE LOS ATRIBUTOS DEL FAME BIOLÓGICO  
EN LAS PRIMERAS LÍNEAS DE TRATAMIENTO EN ARTRITIS REUMATOIDE

Coordinador: Dr. Santiago Muñoz

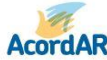

Con la colaboración de:

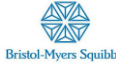

1ª Circulación Delphi

Se le garantiza el anonimato de sus respuestas

Con la cumplimentación de este documento, usted da su consentimiento explícito e inequívoco para que sus datos sean incluidos en el presente fichero, de acuerdo a la Ley Orgánica 15/1999, de 13 de diciembre, de protección de datos de carácter personal, pudiendo ejercer su derecho de acceso, rectificación, cancelación y oposición, dirigiéndose por escrito a Scientia Salus c/Viridiana, 9 portal H 1º izquierda, 28018 Madrid, o bien mediante correo electrónico a [info@2m1salud.net](mailto:info@2m1salud.net)

Así mismo, autoriza y cede el resultado de las respuestas a los fines propios del proyecto: publicación, etc.

☐ Por favor, señale con una "X" confirmando la aceptación a participar en el estudio.

☐ Por favor, señale con una "X" confirmando la autorización a la cesión de sus respuestas.

\* Sexo (Hombre/Mujer) ..... ☐

\* Nombre del centro de trabajo ..... ☐

\* Provincia ..... ☐

\* Cargo en su servicio (según opciones) ..... ☐

\* Años de edad ..... años ☐

\* Años de experiencia en la atención de AR ..... años ☐

\* Años de experiencia en el manejo de FAME biológico en AR ..... años ☐

\* Número de pacientes promedio atendidos en consulta por usted mismo, en 1 semana ..... pacientes ☐

\* Disponibilidad de **hospital de día** (SI/NO)\* ..... ☐

\* En caso afirmativo, indicar tipo (según opciones) ..... ☐

\* Consulta de **AR precoz** (SI/NO) ..... ☐

\* Disponibilidad de **consulta de enfermería reumatológica** (SI/NO) ..... ☐

Marque con una X en el campo NS/NC cuando prefiera no valorar la variable

| 1 - General |                                                                                                                                                             | NS<br>NC | MARQUE CON UNA "X"<br>1 = MÍNIMA IMPORTANCIA<br>9 = MÁXIMA IMPORTANCIA |   |   |   |   |   |   |   |   |
|-------------|-------------------------------------------------------------------------------------------------------------------------------------------------------------|----------|------------------------------------------------------------------------|---|---|---|---|---|---|---|---|
| 1           | Producto con indicación aprobada en AR como primera línea de biológico.                                                                                     |          | 1                                                                      | 2 | 3 | 4 | 5 | 6 | 7 | 8 | 9 |
| 2           | Producto con indicación aprobada en AR tras fallo a FAME biológico.                                                                                         |          | 1                                                                      | 2 | 3 | 4 | 5 | 6 | 7 | 8 | 9 |
| 3           | Producto recomendado en guías (SER, EULAR, ACR, etc.) como primera línea de biológico.                                                                      |          | 1                                                                      | 2 | 3 | 4 | 5 | 6 | 7 | 8 | 9 |
| 4           | Producto recomendado en guías (SER, EULAR, ACR) tras fracaso a un biológico previo.                                                                         |          | 1                                                                      | 2 | 3 | 4 | 5 | 6 | 7 | 8 | 9 |
| 5           | Producto directamente avalado por ensayos clínicos comparativos frente a terapias activas, randomizados y aleatorizados frente a otras terapias biológicas. |          | 1                                                                      | 2 | 3 | 4 | 5 | 6 | 7 | 8 | 9 |
| 6           | Producto adecuado para su utilización en población anciana                                                                                                  |          | 1                                                                      | 2 | 3 | 4 | 5 | 6 | 7 | 8 | 9 |
| 7           | Presentar altas tasas de supervivencia del fármaco                                                                                                          |          | 1                                                                      | 2 | 3 | 4 | 5 | 6 | 7 | 8 | 9 |

  

| 2 - Atributos de Farmacología |                                                                                              | NS<br>NC | MARQUE CON UNA "X"<br>1 = MÍNIMA IMPORTANCIA<br>9 = MÁXIMA IMPORTANCIA |   |   |   |   |   |   |   |   |
|-------------------------------|----------------------------------------------------------------------------------------------|----------|------------------------------------------------------------------------|---|---|---|---|---|---|---|---|
| 8                             | Producto que aporta una estructura, mecanismo de acción y diana terapéutica diferencial.     |          | 1                                                                      | 2 | 3 | 4 | 5 | 6 | 7 | 8 | 9 |
| 9                             | Origen del producto (murino – humano).                                                       |          | 1                                                                      | 2 | 3 | 4 | 5 | 6 | 7 | 8 | 9 |
| 10                            | Vida media (en unos casos, será preferible mayor y en otras menor).                          |          | 1                                                                      | 2 | 3 | 4 | 5 | 6 | 7 | 8 | 9 |
| 11                            | Producto que se acompaña de una baja incidencia de anticuerpos neutralizantes.               |          | 1                                                                      | 2 | 3 | 4 | 5 | 6 | 7 | 8 | 9 |
| 12                            | Producto que no precisa aumento de dosis a largo plazo por pérdida de eficacia (tolerancia). |          | 1                                                                      | 2 | 3 | 4 | 5 | 6 | 7 | 8 | 9 |

  

| 3 - Eficacia |                                                                                       | NS<br>NC | MARQUE CON UNA "X"<br>1 = MÍNIMA IMPORTANCIA<br>9 = MÁXIMA IMPORTANCIA |   |   |   |   |   |   |   |   |
|--------------|---------------------------------------------------------------------------------------|----------|------------------------------------------------------------------------|---|---|---|---|---|---|---|---|
| 13           | Producto que muestra eficacia en pacientes sin tratamiento previo con FAME sintético. |          | 1                                                                      | 2 | 3 | 4 | 5 | 6 | 7 | 8 | 9 |

|    |                                                                                                      |  |   |   |   |   |   |   |   |   |   |
|----|------------------------------------------------------------------------------------------------------|--|---|---|---|---|---|---|---|---|---|
| 14 | Producto que muestra eficacia tras respuesta inadecuada o fracaso a FAME sintético.                  |  | 1 | 2 | 3 | 4 | 5 | 6 | 7 | 8 | 9 |
| 15 | Producto que muestra eficacia tras fallo de otro biológico.                                          |  | 1 | 2 | 3 | 4 | 5 | 6 | 7 | 8 | 9 |
| 16 | Producto eficaz en monoterapia.                                                                      |  | 1 | 2 | 3 | 4 | 5 | 6 | 7 | 8 | 9 |
| 17 | Producto eficaz en AR precoz.                                                                        |  | 1 | 2 | 3 | 4 | 5 | 6 | 7 | 8 | 9 |
| 18 | Producto eficaz en AR establecida.                                                                   |  | 1 | 2 | 3 | 4 | 5 | 6 | 7 | 8 | 9 |
| 19 | Producto con demostrada eficacia en combinación al MTX (u otro FAME)                                 |  | 1 | 2 | 3 | 4 | 5 | 6 | 7 | 8 | 9 |
| 20 | Tratamiento que se acompaña de mejoría en la actividad inflamatoria, según los índices establecidos. |  | 1 | 2 | 3 | 4 | 5 | 6 | 7 | 8 | 9 |
| 21 | Tratamiento que se acompaña de reducción en la progresión del daño articular                         |  | 1 | 2 | 3 | 4 | 5 | 6 | 7 | 8 | 9 |
| 22 | Tratamiento que se acompaña de mejoría de la función física.                                         |  | 1 | 2 | 3 | 4 | 5 | 6 | 7 | 8 | 9 |
| 23 | Tratamiento que se acompaña de mejoría en la calidad de vida.                                        |  | 1 | 2 | 3 | 4 | 5 | 6 | 7 | 8 | 9 |
| 24 | Tratamiento que reduce las comorbilidades asociadas a la AR.                                         |  | 1 | 2 | 3 | 4 | 5 | 6 | 7 | 8 | 9 |
| 25 | Tratamiento eficaz en manifestaciones extra-articulares.                                             |  | 1 | 2 | 3 | 4 | 5 | 6 | 7 | 8 | 9 |
| 26 | Tratamiento caracterizado por su rapidez de acción (respuesta clínica precoz).                       |  | 1 | 2 | 3 | 4 | 5 | 6 | 7 | 8 | 9 |
| 27 | Tratamiento caracterizado por una alta tasa de remisión.                                             |  | 1 | 2 | 3 | 4 | 5 | 6 | 7 | 8 | 9 |
| 28 | Tratamiento caracterizado por una respuesta mantenida a largo plazo                                  |  | 1 | 2 | 3 | 4 | 5 | 6 | 7 | 8 | 9 |
| 29 | Fármaco con evidencia de eficacia en diferente subgrupos inmunológicos de AR.                        |  | 1 | 2 | 3 | 4 | 5 | 6 | 7 | 8 | 9 |
| 30 | Producto que facilite la adherencia al tratamiento                                                   |  | 1 | 2 | 3 | 4 | 5 | 6 | 7 | 8 | 9 |

|               |                                                                                                                                                                                                      |          |                                                                        |   |   |   |   |   |   |   |   |
|---------------|------------------------------------------------------------------------------------------------------------------------------------------------------------------------------------------------------|----------|------------------------------------------------------------------------|---|---|---|---|---|---|---|---|
| 4 - Seguridad |                                                                                                                                                                                                      | NS<br>NC | MARQUE CON UNA "X"<br>1 = MÍNIMA IMPORTANCIA<br>9 = MÁXIMA IMPORTANCIA |   |   |   |   |   |   |   |   |
| 31            | Producto seguro (de forma global).                                                                                                                                                                   |          | 1                                                                      | 2 | 3 | 4 | 5 | 6 | 7 | 8 | 9 |
| 32            | Producto seguro (de forma global) comparado a otros FAME biológicos.                                                                                                                                 |          | 1                                                                      | 2 | 3 | 4 | 5 | 6 | 7 | 8 | 9 |
| 33            | Seguridad demostrada a largo plazo.                                                                                                                                                                  |          | 1                                                                      | 2 | 3 | 4 | 5 | 6 | 7 | 8 | 9 |
| 34            | Producto que no presenta antecedentes de alteraciones del desarrollo prenatal ni postnatal (aunque no sea recomendado en mujeres embarazadas o lactantes e incluso se recomienda la anticoncepción). |          | 1                                                                      | 2 | 3 | 4 | 5 | 6 | 7 | 8 | 9 |
| 35            | Producto con bajo número de contraindicaciones.                                                                                                                                                      |          | 1                                                                      | 2 | 3 | 4 | 5 | 6 | 7 | 8 | 9 |
| 36            | Tratamiento con infrecuentes reacciones alérgicas.                                                                                                                                                   |          | 1                                                                      | 2 | 3 | 4 | 5 | 6 | 7 | 8 | 9 |
| 37            | Tratamiento con baja incidencia de infecciones graves.                                                                                                                                               |          | 1                                                                      | 2 | 3 | 4 | 5 | 6 | 7 | 8 | 9 |
| 38            | Tratamiento que no aumenta la incidencia de tuberculosis.                                                                                                                                            |          | 1                                                                      | 2 | 3 | 4 | 5 | 6 | 7 | 8 | 9 |
| 39            | Producto que no reactiva la hepatitis B.                                                                                                                                                             |          | 1                                                                      | 2 | 3 | 4 | 5 | 6 | 7 | 8 | 9 |
| 40            | Producto que no reactiva la hepatitis C.                                                                                                                                                             |          | 1                                                                      | 2 | 3 | 4 | 5 | 6 | 7 | 8 | 9 |
| 41            | Producto que no reactiva la infección por HIV.                                                                                                                                                       |          | 1                                                                      | 2 | 3 | 4 | 5 | 6 | 7 | 8 | 9 |
| 42            | Producto que no aumenta la incidencia de leucoencefalopatía multifocal progresiva (LMP).                                                                                                             |          | 1                                                                      | 2 | 3 | 4 | 5 | 6 | 7 | 8 | 9 |
| 43            | Producto que no aumenta la incidencia de neoplasias malignas sólidas.                                                                                                                                |          | 1                                                                      | 2 | 3 | 4 | 5 | 6 | 7 | 8 | 9 |

|    |                                                                                                                                                                             |  |   |   |   |   |   |   |   |   |   |
|----|-----------------------------------------------------------------------------------------------------------------------------------------------------------------------------|--|---|---|---|---|---|---|---|---|---|
| 44 | Producto que no aumenta la incidencia de neoplasias hematológicas.                                                                                                          |  | 1 | 2 | 3 | 4 | 5 | 6 | 7 | 8 | 9 |
| 45 | Producto que no aumenta la incidencia de psoriasis cutánea.                                                                                                                 |  | 1 | 2 | 3 | 4 | 5 | 6 | 7 | 8 | 9 |
| 46 | Producto que no aumenta la inducción de cuadros lúpicos.                                                                                                                    |  | 1 | 2 | 3 | 4 | 5 | 6 | 7 | 8 | 9 |
| 47 | Producto seguro en pacientes con patología cardiovascular.                                                                                                                  |  | 1 | 2 | 3 | 4 | 5 | 6 | 7 | 8 | 9 |
| 48 | Producto seguro en pacientes con enfermedad pulmonar intersticial.                                                                                                          |  | 1 | 2 | 3 | 4 | 5 | 6 | 7 | 8 | 9 |
| 49 | Producto seguro en pacientes con enfermedad desmielinizante.                                                                                                                |  | 1 | 2 | 3 | 4 | 5 | 6 | 7 | 8 | 9 |
| 50 | Tratamiento que no altere la respuesta inmunológica de la vacuna.                                                                                                           |  | 1 | 2 | 3 | 4 | 5 | 6 | 7 | 8 | 9 |
| 51 | Producto compatible y sin interacción con los tratamientos habituales de la AR: metotrexato, sulfasalazina, hidroxicloroquina, o leflunomida, AINEs, corticosteroides, etc. |  | 1 | 2 | 3 | 4 | 5 | 6 | 7 | 8 | 9 |
| 52 | Producto seguro con un amplio intervalo de dosis.                                                                                                                           |  | 1 | 2 | 3 | 4 | 5 | 6 | 7 | 8 | 9 |
| 53 | Mostrar reducción en la mortalidad.                                                                                                                                         |  | 1 | 2 | 3 | 4 | 5 | 6 | 7 | 8 | 9 |
| 54 | Tratamiento sin alteraciones del perfil lipídico aterogénico.                                                                                                               |  | 1 | 2 | 3 | 4 | 5 | 6 | 7 | 8 | 9 |
| 55 | Tratamiento sin alteración en las enzimas hepáticas.                                                                                                                        |  | 1 | 2 | 3 | 4 | 5 | 6 | 7 | 8 | 9 |
| 56 | Tratamiento sin alteración en los recuentos hematológicos.                                                                                                                  |  | 1 | 2 | 3 | 4 | 5 | 6 | 7 | 8 | 9 |
| 57 | Producto cuyos excipientes evitan potenciales intolerancias.                                                                                                                |  | 1 | 2 | 3 | 4 | 5 | 6 | 7 | 8 | 9 |
| 58 | En autoadministración, el tratamiento no se acompaña de dolor ni reacción en el punto de la inyección (caso de ser SC).                                                     |  | 1 | 2 | 3 | 4 | 5 | 6 | 7 | 8 | 9 |
| 59 | Tratamiento con baja tasa de reacciones infusionales (caso de ser IV).                                                                                                      |  | 1 | 2 | 3 | 4 | 5 | 6 | 7 | 8 | 9 |
| 60 | Presentar una escasa incidencia/tasa de AA.                                                                                                                                 |  | 1 | 2 | 3 | 4 | 5 | 6 | 7 | 8 | 9 |
| 61 | Presentar una escasa incidencia de AA graves.                                                                                                                               |  | 1 | 2 | 3 | 4 | 5 | 6 | 7 | 8 | 9 |

|                    |                                                                        |          |                                                                        |   |   |   |   |   |   |   |   |
|--------------------|------------------------------------------------------------------------|----------|------------------------------------------------------------------------|---|---|---|---|---|---|---|---|
| 5 - Administración |                                                                        | NS<br>NC | MARQUE CON UNA "X"<br>1 = MÍNIMA IMPORTANCIA<br>9 = MÁXIMA IMPORTANCIA |   |   |   |   |   |   |   |   |
| 62                 | Presentar diferentes alternativas de vía de administración (IV y SC).  |          | 1                                                                      | 2 | 3 | 4 | 5 | 6 | 7 | 8 | 9 |
| 63                 | No necesidad de dosis de carga.                                        |          | 1                                                                      | 2 | 3 | 4 | 5 | 6 | 7 | 8 | 9 |
| 64                 | No precisar un largo tiempo de perfusión.                              |          | 1                                                                      | 2 | 3 | 4 | 5 | 6 | 7 | 8 | 9 |
| 65                 | Cómodas condiciones y periodo de estabilidad del fármaco reconstituido |          | 1                                                                      | 2 | 3 | 4 | 5 | 6 | 7 | 8 | 9 |
| 66                 | Presentarse en un dispositivo simple y ergonómico.                     |          | 1                                                                      | 2 | 3 | 4 | 5 | 6 | 7 | 8 | 9 |
| 67                 | No contener látex en el dispositivo.                                   |          | 1                                                                      | 2 | 3 | 4 | 5 | 6 | 7 | 8 | 9 |

|           |                                                                                   |          |                                                                        |   |   |   |   |   |   |   |   |
|-----------|-----------------------------------------------------------------------------------|----------|------------------------------------------------------------------------|---|---|---|---|---|---|---|---|
| 6 - Coste |                                                                                   | NS<br>NC | MARQUE CON UNA "X"<br>1 = MÍNIMA IMPORTANCIA<br>9 = MÁXIMA IMPORTANCIA |   |   |   |   |   |   |   |   |
| 68        | Tener bajos costes directos de tratamiento.                                       |          | 1                                                                      | 2 | 3 | 4 | 5 | 6 | 7 | 8 | 9 |
| 69        | Tener un bajo coste debido a la preparación en farmacia (optimización de viales). |          | 1                                                                      | 2 | 3 | 4 | 5 | 6 | 7 | 8 | 9 |
| 70        | Tener un bajo coste de la administración del medicamento.                         |          | 1                                                                      | 2 | 3 | 4 | 5 | 6 | 7 | 8 | 9 |
| 71        | Tener un bajo coste de monitorización.                                            |          | 1                                                                      | 2 | 3 | 4 | 5 | 6 | 7 | 8 | 9 |

|    |                                                                                                                                                |  |   |   |   |   |   |   |   |   |   |
|----|------------------------------------------------------------------------------------------------------------------------------------------------|--|---|---|---|---|---|---|---|---|---|
| 72 | Demostrar un coste efectividad incremental favorable.                                                                                          |  | 1 | 2 | 3 | 4 | 5 | 6 | 7 | 8 | 9 |
| 73 | Tener soporte de estudios de farmacoeconomía versus otras alternativas biológicas.                                                             |  | 1 | 2 | 3 | 4 | 5 | 6 | 7 | 8 | 9 |
| 74 | Acompañarse de una reducción de la discapacidad laboral.                                                                                       |  | 1 | 2 | 3 | 4 | 5 | 6 | 7 | 8 | 9 |
| 75 | Mostrar una reducción de los costes indirectos.                                                                                                |  | 1 | 2 | 3 | 4 | 5 | 6 | 7 | 8 | 9 |
| 76 | Haber demostrado tener una pauta flexible que permita reducir dosis o prolongar el intervalo en pacientes en remisión (optimización de dosis). |  | 1 | 2 | 3 | 4 | 5 | 6 | 7 | 8 | 9 |
| 77 | Disponer de una presentación que coincide con la pauta terapéutica                                                                             |  | 1 | 2 | 3 | 4 | 5 | 6 | 7 | 8 | 9 |

MUCHAS GRACIAS.  
POR FAVOR, REVISE QUE EL CUESTIONARIO ESTA COMPLETO Y GUARDELO, ANTES DE ENVIARLO A:  
[acordar@2m1salud.net](mailto:acordar@2m1salud.net)
